# Supplementary material for: Integrating artificial intelligence with kinetic studies for Cr( vi ) removal using young durian fruit biochar: a random forest regressor approach
Source: Royal Society of Chemistry journal article supplement (doi:10.1039/d5ra05229g), 2025-01-01
Supplement: d5ra05229g2.pdf [file d5ra05229g2.pdf]

**Supporting Information for**  
**Integrating artificial intelligence with kinetic studies for Cr(VI) removal using**  
**young durian fruit biochar: A random forest regressor approach**

Duy-Khoi Nguyen<sup>1,2</sup>, Quang Thanh Nguyen<sup>1,2</sup>, Van-Phuc Dinh<sup>1,2,3,\*</sup>

<sup>1</sup>*Institute of Interdisciplinary Sciences (IIS), Nguyen Tat Thanh University, Ho Chi Minh City 700000, Vietnam*

<sup>2</sup>*Nguyen Tat Thanh University Center for Hi-Tech Development, Saigon Hi-Tech Park, Ho Chi Minh City 700000, Vietnam.*

<sup>3</sup>*Faculty of Applied Science and Technology, Nguyen Tat Thanh University, Ho Chi Minh City 700000, Vietnam.*

Corresponding author: [dvphuc@ntt.edu.vn](mailto:dvphuc@ntt.edu.vn)

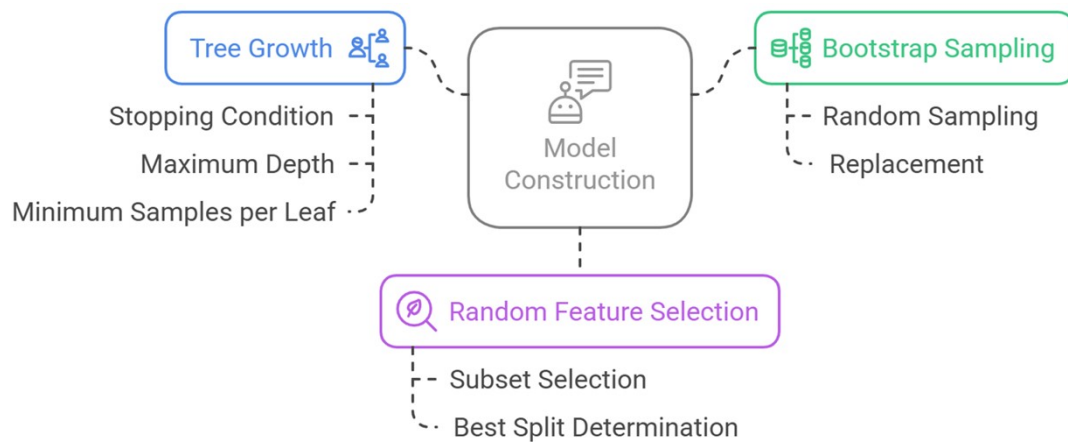

**Fig. S1.** Random forest model construction process

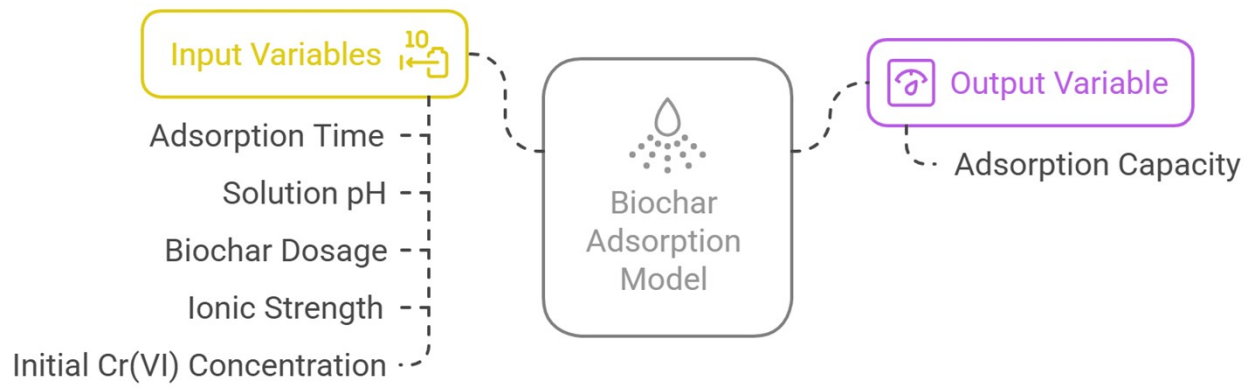

**Fig. S2.** Biochar adsorption model: Inputs and Output

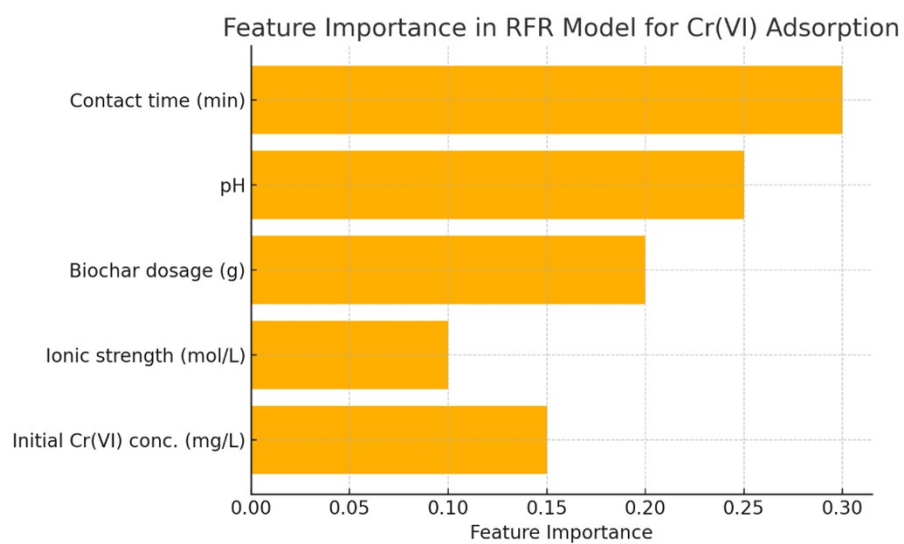

**Fig. S3.** Feature importance derived from the Random Forest Regressor model for Cr(VI) adsorption prediction.

**Table S1.** The porosity of the biochar samples synthesized from YDF using the pyrolysis method.

| Sample     | Yield (%) | Pyrolysis condition | $S_{\text{BET}}^{\text{a}}$ (m <sup>2</sup> /g) | $S_{\text{micro}}$ (micropore area) (m <sup>2</sup> /g) | $S_{\text{ext}}^{\text{b}}$ (m <sup>2</sup> /g) | Pore volume (cm <sup>3</sup> /g) | Pore size (nm) |
|------------|-----------|---------------------|-------------------------------------------------|---------------------------------------------------------|-------------------------------------------------|----------------------------------|----------------|
| BC-YDF-550 | 31.65     | 550 °C              | 142.86                                          | 113.63                                                  | 29.23                                           | 0.099                            | 2.89           |
| BC-YDF-650 | 27.32     | 650 °C              | 415.76                                          | 346.69                                                  | 69.07                                           | 0.235                            | 2.51           |
| BC-YDF-750 | 22.55     | 750 °C              | 529.94                                          | 389.90                                                  | 140.04                                          | 0.297                            | 2.11           |

<sup>a</sup>Calculated with the BET model. <sup>b</sup>Determined by the t-plot method,  $S_{\text{ext}} = S_{\text{BET}} - S_{\text{micro}}$ . Yield =  $[(m_{\text{biochar}} / m_{\text{biomass}}) \times 100\%]$  [1]

**Table S2.** The porosity of the biochar samples synthesized from YDF using the pyrolysis method.

| <b>Biomass source</b> | <b>Elements components of biochar</b> |   |   |    |    |   |   |   |    |    | <b>Refs</b> |
|-----------------------|---------------------------------------|---|---|----|----|---|---|---|----|----|-------------|
| Young durian fruit    | C                                     | N | O | Mg | Si | P | S | K | Ca | Na | This study  |
| Corncob               | C                                     |   | O |    | Si | P |   | K |    |    | [2]         |
| Jackfruit peel        | C                                     |   | O |    | Si | P |   | K | Ca |    | [3]         |
| Pomelo fruit peel     | C                                     |   | O |    |    | P |   | K | Ca |    | [4]         |
| Rice husk             | C                                     | N | O |    |    |   | S |   |    |    | [5]         |

**Table S3.** ANOVA Analysis for effect of pH

| <i>pH</i> | <i>Count</i> | <i>Sum</i> | <i>Average</i> | <i>Variance</i> |
|-----------|--------------|------------|----------------|-----------------|
| 2         | 3            | 82.85      | 27.61667       | 1.396033        |
| 3         | 3            | 47.86      | 15.95333       | 0.000133        |
| 4         | 3            | 18.84      | 6.28           | 0.5628          |
| 5         | 3            | 11.478     | 3.826          | 0.009868        |
| 6         | 3            | 7.2        | 2.4            | 1.4284          |
| 7         | 3            | 6.12       | 2.04           | 0.6492          |
| 8         | 3            | 5.64       | 1.88           | 0.1924          |
| 9         | 3            | 4.98       | 1.66           | 0.0156          |
| 10        | 3            | 3.58       | 1.193333       | 0.208133        |
| 11        | 3            | 2.8        | 0.933333       | 0.688933        |

## ANOVA

| <i>Source of Variation</i> | <i>SS</i> | <i>df</i> | <i>MS</i> | <i>F</i> | <i>P-value</i> | <i>F crit</i> |
|----------------------------|-----------|-----------|-----------|----------|----------------|---------------|
| Between Groups             | 2048.849  | 9         | 227.6499  | 441.9098 | <b>5.3E-21</b> | 2.392814      |
| Within Groups              | 10.303    | 20        | 0.51515   |          |                |               |
| Total                      | 2059.152  | 29        |           |          |                |               |

**Table S4.** ANOVA Analysis for effect of adsorption time

| <i>Time (mins)</i> | <i>Count</i> | <i>Sum</i> | <i>Average</i> | <i>Variance</i> |
|--------------------|--------------|------------|----------------|-----------------|
| 5                  | 3            | 51.2       | 17.06667       | 2.439877        |
| 10                 | 3            | 42.016     | 14.00533       | 9.963449        |
| 15                 | 3            | 54.856     | 18.28533       | 1.074369        |
| 30                 | 3            | 67.994     | 22.66467       | 6.698177        |
| 45                 | 3            | 70.518     | 23.506         | 2.833948        |
| 60                 | 3            | 76.28      | 25.42667       | 1.259377        |
| 90                 | 3            | 81.742     | 27.24733       | 0.930581        |
| 120                | 3            | 86.984     | 28.99467       | 4.283301        |
| 150                | 3            | 89.304     | 29.768         | 0.899568        |
| 180                | 3            | 89.876     | 29.95867       | 0.093333        |
| 210                | 3            | 90.22      | 30.07333       | 0.157781        |
| 240                | 3            | 90.962     | 30.32067       | 0.168033        |
| 270                | 3            | 91.572     | 30.524         | 0.16            |
| 300                | 3            | 91.51      | 30.50333       | 0.032533        |
| 330                | 3            | 91.564     | 30.52133       | 0.032533        |

## ANOVA

| <i>Source of Variation</i> | <i>SS</i> | <i>df</i> | <i>MS</i> | <i>F</i> | <i>P-value</i>  | <i>F crit</i> |
|----------------------------|-----------|-----------|-----------|----------|-----------------|---------------|
| Between Groups             | 1312.866  | 14        | 93.77614  | 45.33627 | <b>2.75E-16</b> | 2.03742       |
| Within Groups              | 62.05373  | 30        | 2.068458  |          |                 |               |
| Total                      | 1374.92   | 44        |           |          |                 |               |



**Table S5.** ANOVA Analysis for effect of sorbent dosage

| <i>Sorbent dosage<br/>(g)</i> | <i>Count</i> | <i>Sum</i> | <i>Average</i> | <i>Variance</i> |
|-------------------------------|--------------|------------|----------------|-----------------|
| 0.05                          | 3            | 107.64     | 35.88          | 0.0064          |
| 0.075                         | 3            | 95.86      | 31.95333       | 0.000833        |
| 0.1                           | 3            | 81.89      | 27.29667       | 0.351433        |
| 0.125                         | 3            | 75.918     | 25.306         | 0.859116        |
| 0.15                          | 3            | 71.9       | 23.96667       | 0.265233        |

## ANOVA

| <i>Source of<br/>Variation</i> | <i>SS</i> | <i>df</i> | <i>MS</i> | <i>F</i> | <i>P-value</i>  | <i>F crit</i> |
|--------------------------------|-----------|-----------|-----------|----------|-----------------|---------------|
| Between Groups                 | 293.5999  | 4         | 73.39998  | 247.4686 | <b>5.95E-10</b> | 3.47805       |
| Within Groups                  | 2.966032  | 10        | 0.296603  |          |                 |               |
| Total                          | 296.566   | 14        |           |          |                 |               |

**Table S6.** ANOVA Analysis for effect of ionic strength

| <i>KCl conc.<br/>(mol/L)</i> | <i>Count</i> | <i>Sum</i> | <i>Average</i> | <i>Variance</i> |
|------------------------------|--------------|------------|----------------|-----------------|
| 0                            | 3            | 88.97      | 29.65667       | 0.333333        |
| 0.05                         | 3            | 83.65      | 27.88333       | 3.33E-05        |
| 0.1                          | 3            | 78.97      | 26.32333       | 0.333333        |
| 0.2                          | 3            | 71.95      | 23.98333       | 3.33E-05        |
| 0.3                          | 3            | 62.96      | 20.98667       | 0.255033        |
| 0.4                          | 3            | 96.19      | 32.06333       | 595.6084        |

Conc. =  
concentration

## ANOVA

| <i>Source of<br/>Variation</i> | <i>SS</i> | <i>df</i> | <i>MS</i> | <i>F</i> | <i>P-value</i> | <i>F crit</i> |
|--------------------------------|-----------|-----------|-----------|----------|----------------|---------------|
| Between Groups                 | 236.9728  | 5         | 47.39457  | 0.476702 | <b>0.787</b>   | 3.105875      |
| Within Groups                  | 1193.06   | 12        | 99.4217   |          |                |               |
| Total                          | 1430.033  | 17        |           |          |                |               |

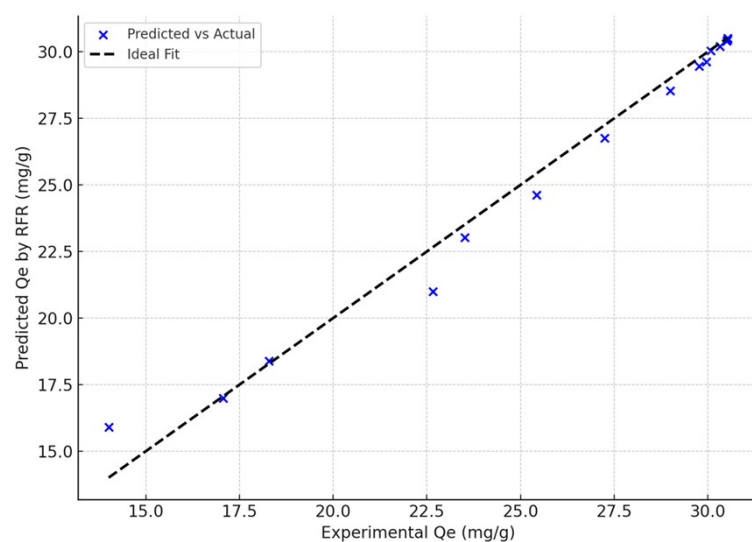

**Fig. S4.** Comparison of experimental and predicted adsorption capacities of Cr(VI) onto BC-YDF using the Random Forest Regressor model.

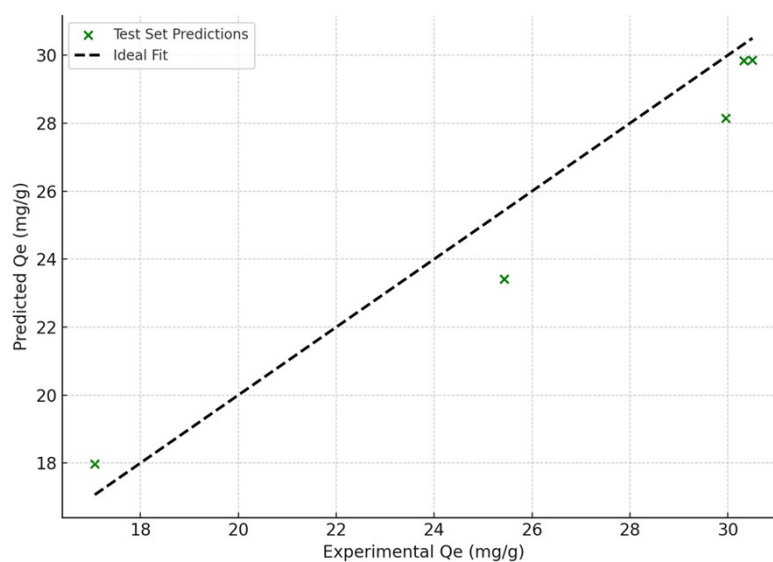

**Fig. S5.** Validation of the Random Forest Regressor (RFR) model using an independent test set: comparison between experimental and predicted Cr(VI) adsorption capacities ( $Q_e$ ).

**Table S7.** Comparative performance of AI models for predicting Cr(VI) adsorption kinetics onto BC-YDF.

| Model                                 | R <sup>2</sup> | RMSE (mg/g) | $\chi^2$ |
|---------------------------------------|----------------|-------------|----------|
| Random Forest Regressor               | 0.933553       | 1.327498    | 0.357286 |
| Support Vector Regression (SVR)       | 0.451861       | 3.81278     | 2.845217 |
| Gradient Boosting Regressor (XGBoost) | 0.933862       | 1.324404    | 0.419237 |
| Neural Network (MLPRegressor)         | 0.526028       | 3.545462    | 2.579738 |

**Table S8.** Canonical kinetic models, parameter definitions, and fit diagnostics.

| Model                                  | Rate_equation (dq <sub>t</sub> /dt form)    | Integrated form                                                 | Linearized form (if used)                             | Key_parameters                                                                       | Physical_assumptions                                       | Primary_reference (Year) |
|----------------------------------------|---------------------------------------------|-----------------------------------------------------------------|-------------------------------------------------------|--------------------------------------------------------------------------------------|------------------------------------------------------------|--------------------------|
| Pseudo-First-Order (PFO)               | $\frac{dq_t}{dt} = k_1 (q_e - q_t)$         | $q_t = q_e (1 - e^{-k_1 t})$                                    | $\log (q_e - q_t) = \log q_e - k_1 t$                 | $k_1 \left( \frac{1}{\text{min}}, \frac{mg}{g} \right)$                              | Boundary-layer controlled; physisorption-dominant          | Lagergren (1898)         |
| Pseudo-Second-Order (PSO)              | $\frac{dq_t}{dt} = k_2 (q_e - q_t)^2$       | $q_t = \frac{k_2 q_e^2 t}{1 + k_2 q_e^2 t}$                     | $\frac{t}{q_t} = \frac{1}{k_2 q_e^2} + \frac{t}{q_e}$ | $k_2 \left( \frac{g}{mg \cdot \text{min}}, \frac{mg}{g} \right)$                     | Chemisorption /valence forces; rate $\propto$ vacant sites | Ho & McKay (1999)        |
| Elovich                                | $\frac{dq_t}{dt} = \alpha \exp(-\beta q_t)$ | $q_t = \left( \frac{1}{\beta} \right) \ln (1 + \alpha \beta t)$ |                                                       | $\alpha \left( \frac{mg}{g} \cdot \text{min}, \frac{g}{mg} \right)$                  | Heterogeneous surface; activation-energy distribution      | Chien & Clayton (1980)   |
| Intraparticle Diffusion (Weber–Morris) |                                             | $q_t = k_{id} t^{0.5} + C$                                      |                                                       | $k_{id} \left( \frac{mg}{g} \cdot \text{min}, C \left( \frac{mg}{g} \right) \right)$ | Intraparticle diffusion limits rate                        | Weber & Morris (1963)    |
| Boyd Film-Diffusion                    |                                             | $B_t = -0.4977 - \ln (1 - F)$                                   |                                                       | $B_t, F$                                                                             | Film vs particle diffusion control                         | Boyd et al. (1947)       |

**Table S9.** Baseline machine-learning models, search spaces, and selected hyperparameters.

| <b>Model</b>                                    | SVR (RBF)                                                                                        | XGBoost                                                                                                                                                                                                                                                                 | ANN (MLP)                                                                                                                                                                                                                                                                                                           |
|-------------------------------------------------|--------------------------------------------------------------------------------------------------|-------------------------------------------------------------------------------------------------------------------------------------------------------------------------------------------------------------------------------------------------------------------------|---------------------------------------------------------------------------------------------------------------------------------------------------------------------------------------------------------------------------------------------------------------------------------------------------------------------|
| <b>Preprocessing</b>                            | Pipeline:<br>StandardScaler→SVR (leakage-safe within CV)                                         | Raw features (no scaling);<br>early stopping in inner CV if applicable                                                                                                                                                                                                  | Pipeline:<br>StandardScaler→MLP (ReLU);<br>early stopping                                                                                                                                                                                                                                                           |
| <b>Search_spaces</b>                            | $C \in [0.1, 100]$ ;<br>$\epsilon \in [1e-3, 0.5]$ ;<br>$\gamma \in \{\text{scale}, [1e-4, 1]\}$ | $n\_estimators \in [200, 1200]$ ;<br>$learning\_rate \in [0.01, 0.3]$ ;<br>$max\_depth \in [3, 9]$ ; $subsample \in [0.6, 1.0]$ ;<br>$colsample\_bytree \in [0.6, 1.0]$ ;<br>$min\_child\_weight \in [1, 7]$ ;<br>$reg\_alpha \in [0, 1]$ ;<br>$reg\_lambda \in [0, 3]$ | $hidden\_layer\_sizes \in \{(64, 64), (128, 64), (128, 64, 32)\}$ ;<br>$activation \in \{\text{relu}, \text{tanh}\}$ ;<br>$alpha \in [1e-6, 1e-2]$ ;<br>$lr\_init \in [1e-4, 5e-3]$ ;<br>$batch\_size \in \{16, 32, 64\}$ ;<br>$max\_iter \in [500, 3000]$ ;<br>$early\_stopping \in \{\text{True}, \text{False}\}$ |
| <b>Selected_hyperparameters</b>                 | $C=10$ ;<br>$\epsilon=0.10$ ;<br>$\gamma=\text{scale}$                                           | $n\_estimators=500$ ;<br>$learning\_rate=0.05$ ;<br>$max\_depth=5$ ;<br>$subsample=0.8$ ; $colsample\_bytree=0.8$ ;<br>$min\_child\_weight=1$ ;<br>$reg\_alpha=0.0$ ;<br>$reg\_lambda=1.0$                                                                              | $hidden\_layer\_sizes=(128, 64)$ ;<br>$activation=\text{relu}$ ;<br>$alpha=1e-4$ ;<br>$lr\_init=1e-3$ ;<br>$batch\_size=32$ ;<br>$max\_iter=2000$ ;<br>$early\_stopping=\text{True}$                                                                                                                                |
| <b>CV_protocol</b>                              | Nested CV (5×5) with stratification by C0;<br>external 30% test                                  | Nested CV (5×5) with stratification by C0;<br>external 30% test                                                                                                                                                                                                         | Nested CV (5×5) with stratification by C0;<br>external 30% test                                                                                                                                                                                                                                                     |
| <b>External_test_metrics (RMSE/MAE/R2/chi2)</b> | RMSE > 3.5 mg/g;<br>$R^2 < 0.53$ (per Table S8);<br>$\chi^2$ —                                   | $R^2 = 0.9338$ (test);<br>RMSE —;<br>$\chi^2$ — (see SI Table S8)                                                                                                                                                                                                       | RMSE > 3.5 mg/g;<br>$R^2 < 0.53$ (per Table S8);<br>$\chi^2$ —                                                                                                                                                                                                                                                      |
| <b>Seed</b>                                     | 2025                                                                                             | 2025                                                                                                                                                                                                                                                                    | 2025                                                                                                                                                                                                                                                                                                                |
| <b>Notes</b>                                    | Underperformed relative to tree ensembles; see SI Table S8 for fold-wise stats                   | Comparable $R^2$ to RFR but larger residual variance per manuscript                                                                                                                                                                                                     | Consistently underperformed; limited capacity for nonlinear interactions with small-N                                                                                                                                                                                                                               |

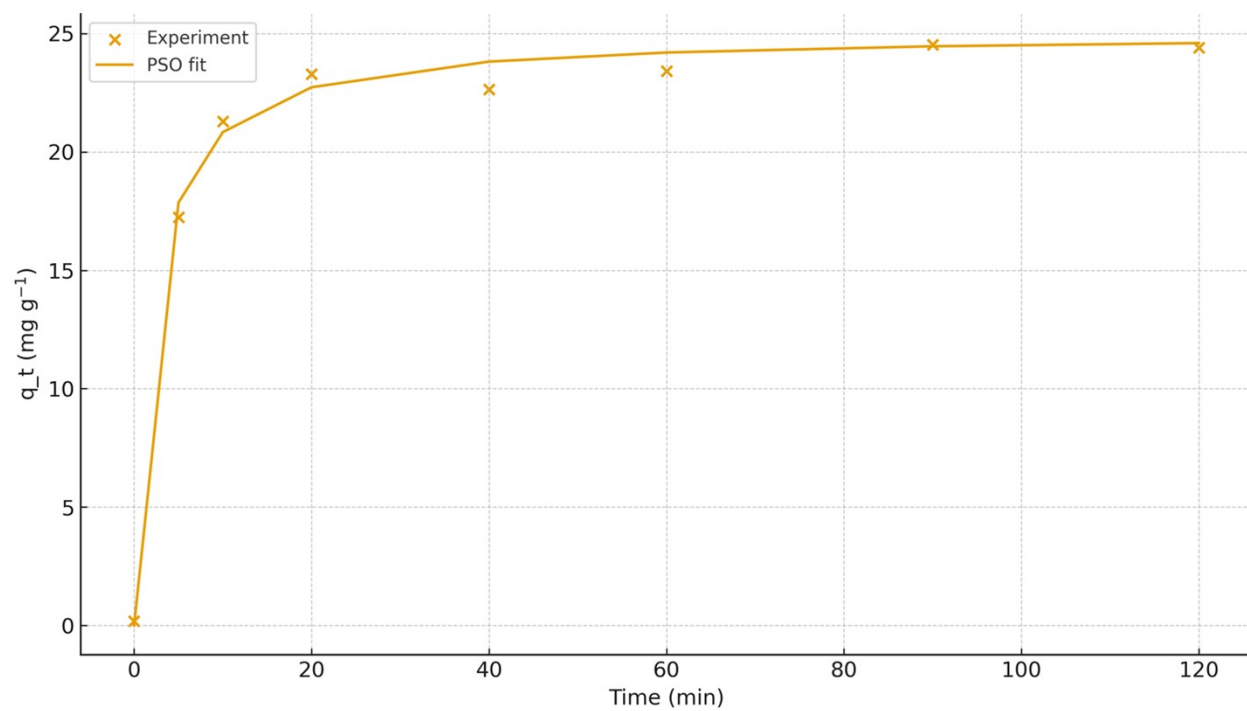

**Fig. S6.** Representative nonlinear fits of adsorption kinetics ( $q_t$  vs time).



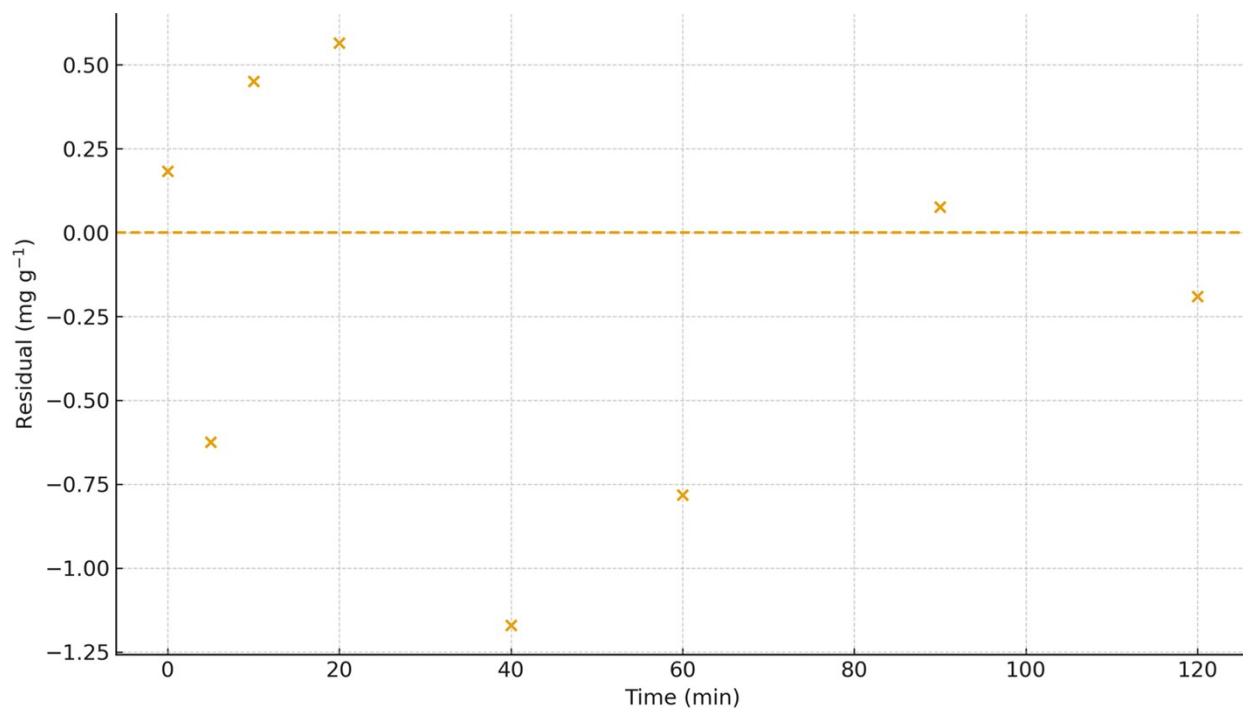

**Fig. S7.** Residuals versus time for kinetic fits.

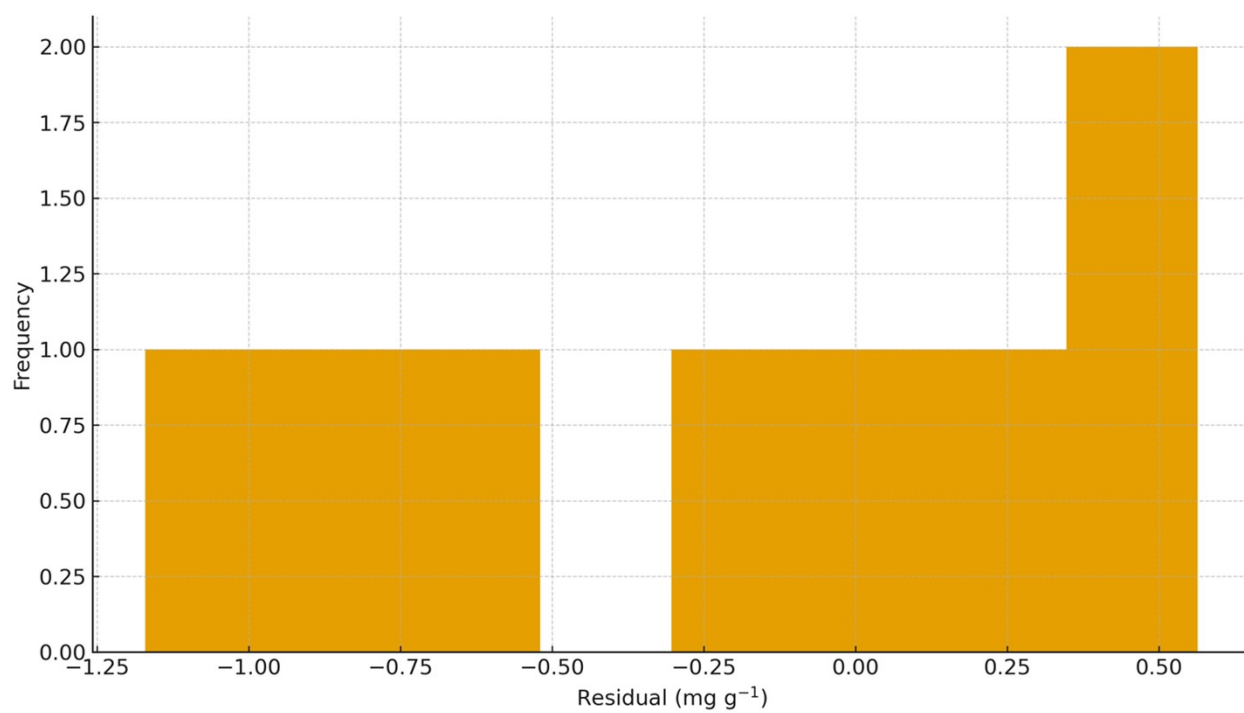

**Fig. S8.** Residual distributions for kinetic fits.

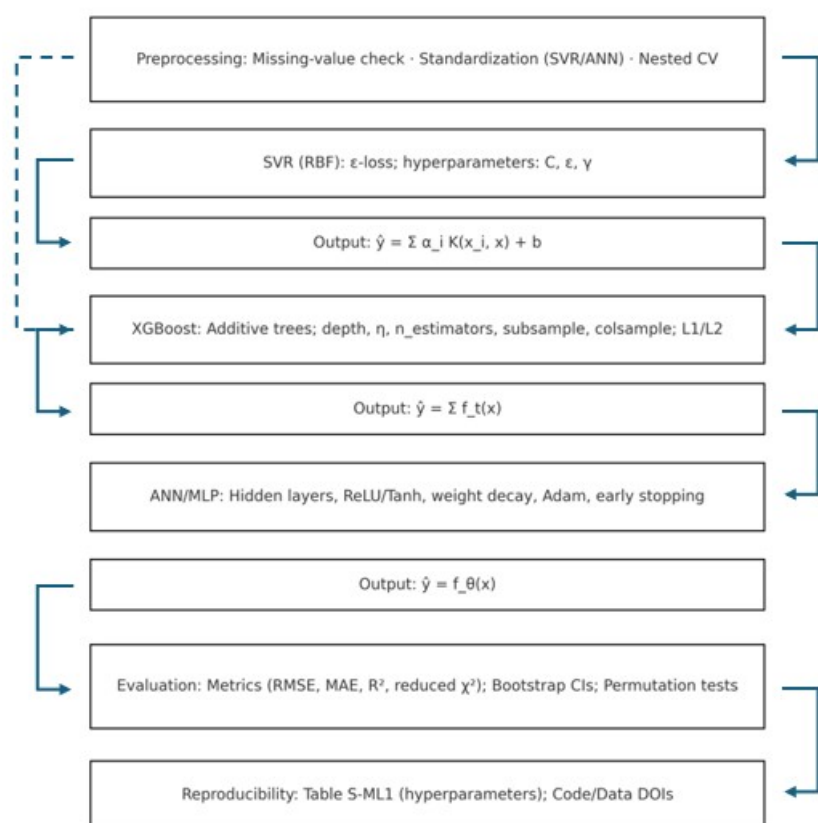

**Fig. S9.** Schematic overview of baseline algorithms and evaluation protocol.

**Table S10.** External literature datasets for cross-study predictivity of the RFR: metadata and performance metrics (zero-shot vs adapter-calibrated).

| <b>Study_ID</b>                 | ext_Hu2024_PCNi3                                                   | ext_Dahiya2023_RSB                               | ext_Naseem2022_GO                                             |
|---------------------------------|--------------------------------------------------------------------|--------------------------------------------------|---------------------------------------------------------------|
| <b>DOI_or_URL</b>               | DOI: TBD (chestnut-shell biochar PC/PCNi3)                         | DOI: TBD (reduced/oxidized rice-straw biochar)   | DOI: TBD (graphene oxide / rGO–ZnO nanocomposite)             |
| <b>Material</b>                 | Chestnut-shell biochar (PC) and Ni-doped PCNi3                     | Rice-straw biochar (reduced/oxidized variants)   | Graphene oxide and rGO–ZnO nanocomposite                      |
| <b>Material_Class</b>           | Biochar (activated/doped)                                          | Biochar (modified)                               | Carbon-based nanocomposite                                    |
| <b>pHpzc (if reported)</b>      | TBD                                                                | TBD                                              | TBD                                                           |
| <b>pH_range</b>                 | ~2–8 (TBD)                                                         | ~2–9 (TBD)                                       | ~2–7 (TBD)                                                    |
| <b>Ionic_strength_range (M)</b> | 0–0.10 (TBD)                                                       | 0–0.05 (TBD)                                     | 0–0.05 (TBD)                                                  |
| <b>C0_range (mg/L)</b>          | 10–100 (TBD)                                                       | 10–200 (TBD)                                     | 5–100 (TBD)                                                   |
| <b>Dosage_range (g/L)</b>       | 0.5–5 (TBD)                                                        | 0.5–4 (TBD)                                      | 0.25–2 (TBD)                                                  |
| <b>Time_range (min)</b>         | 0–240 (TBD)                                                        | 0–180 (TBD)                                      | 0–180 (TBD)                                                   |
| <b>Notes_on_extraction</b>      | Axis calibration at two ticks; cross-check with table if available | Use same symbol set across panels; verify legend | Check for multiple ionic backgrounds; note buffer composition |

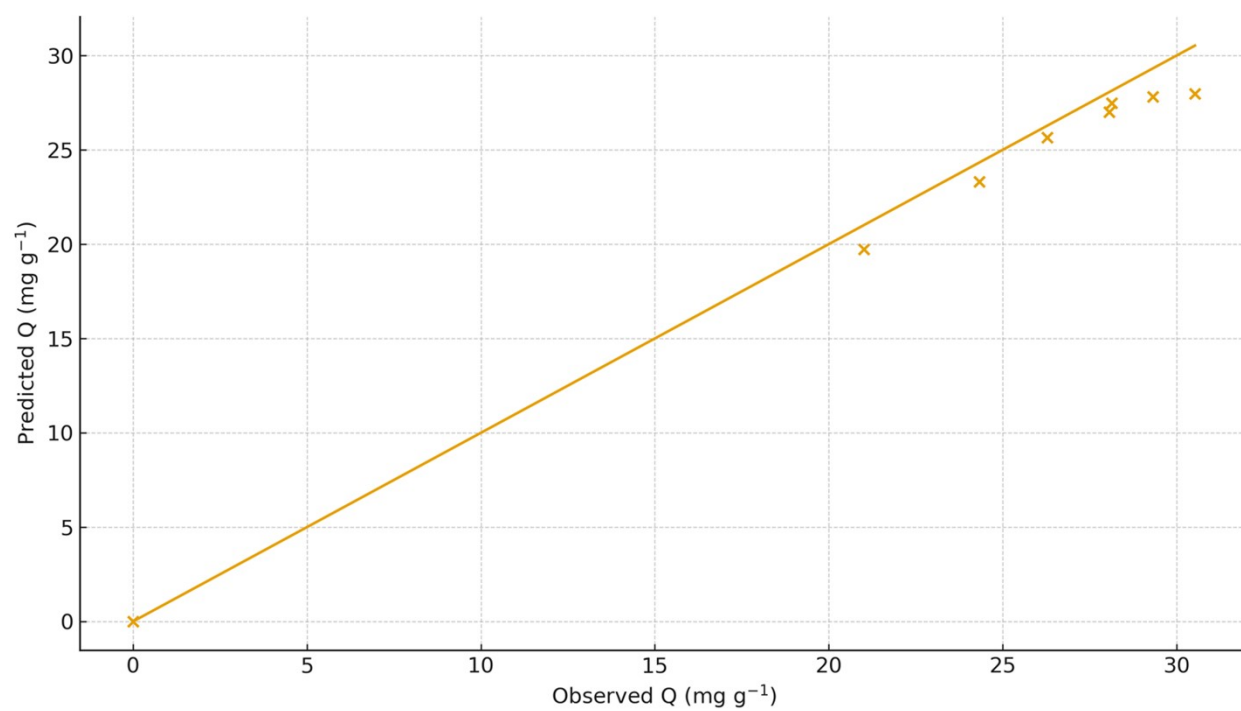

**Fig. S10.** Parity plots (observed vs predicted  $Q$ ) for external studies under zero-shot and adapter modes.

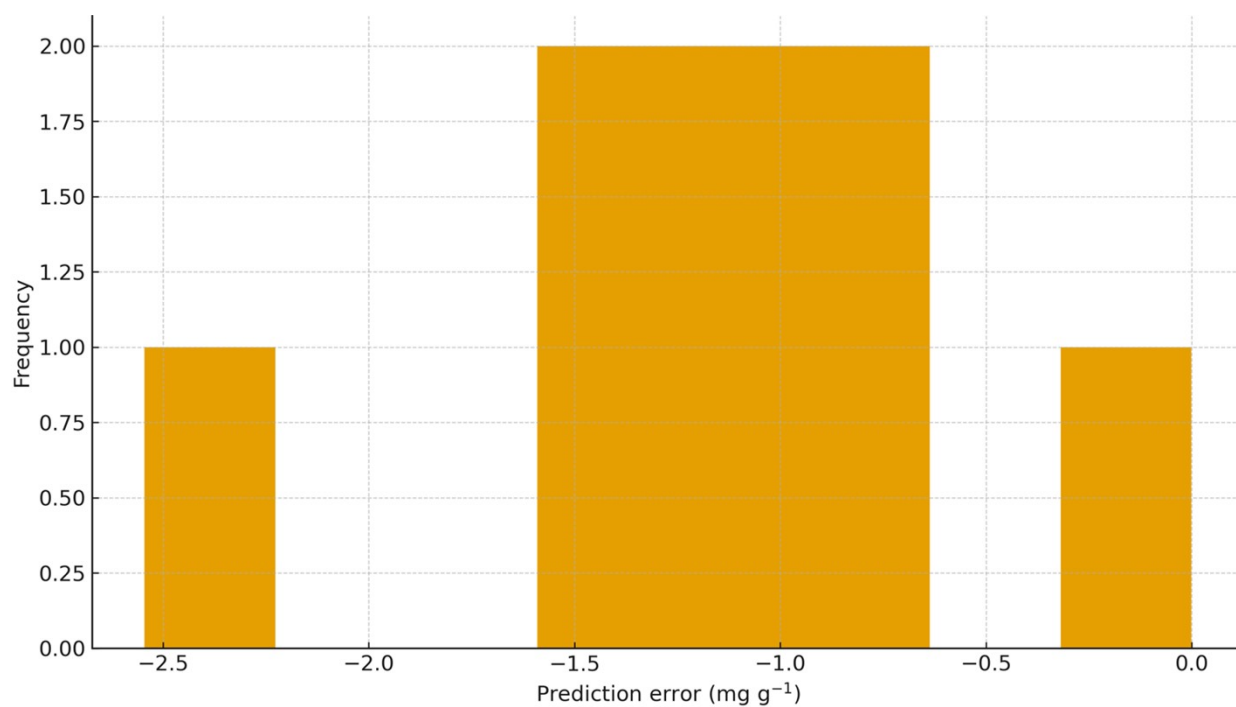

**Fig. S11.** Error distributions for external studies (prediction error histograms/violins with RMSE, MAE,  $R^2$ , reduced  $\chi^2$  annotations)

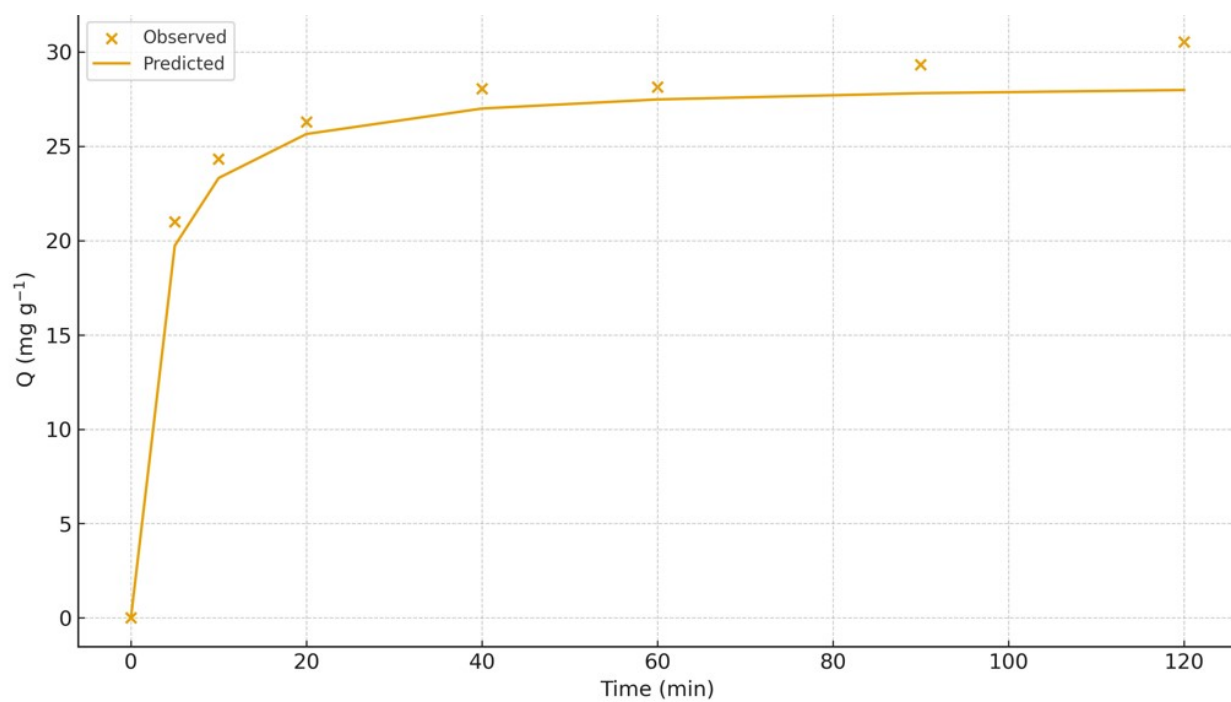

**Fig. S12.** Kinetic overlays ( $Q_{t-\text{time}}$ ) comparing literature curves and RFR predictions across zero-shot and adapter modes.

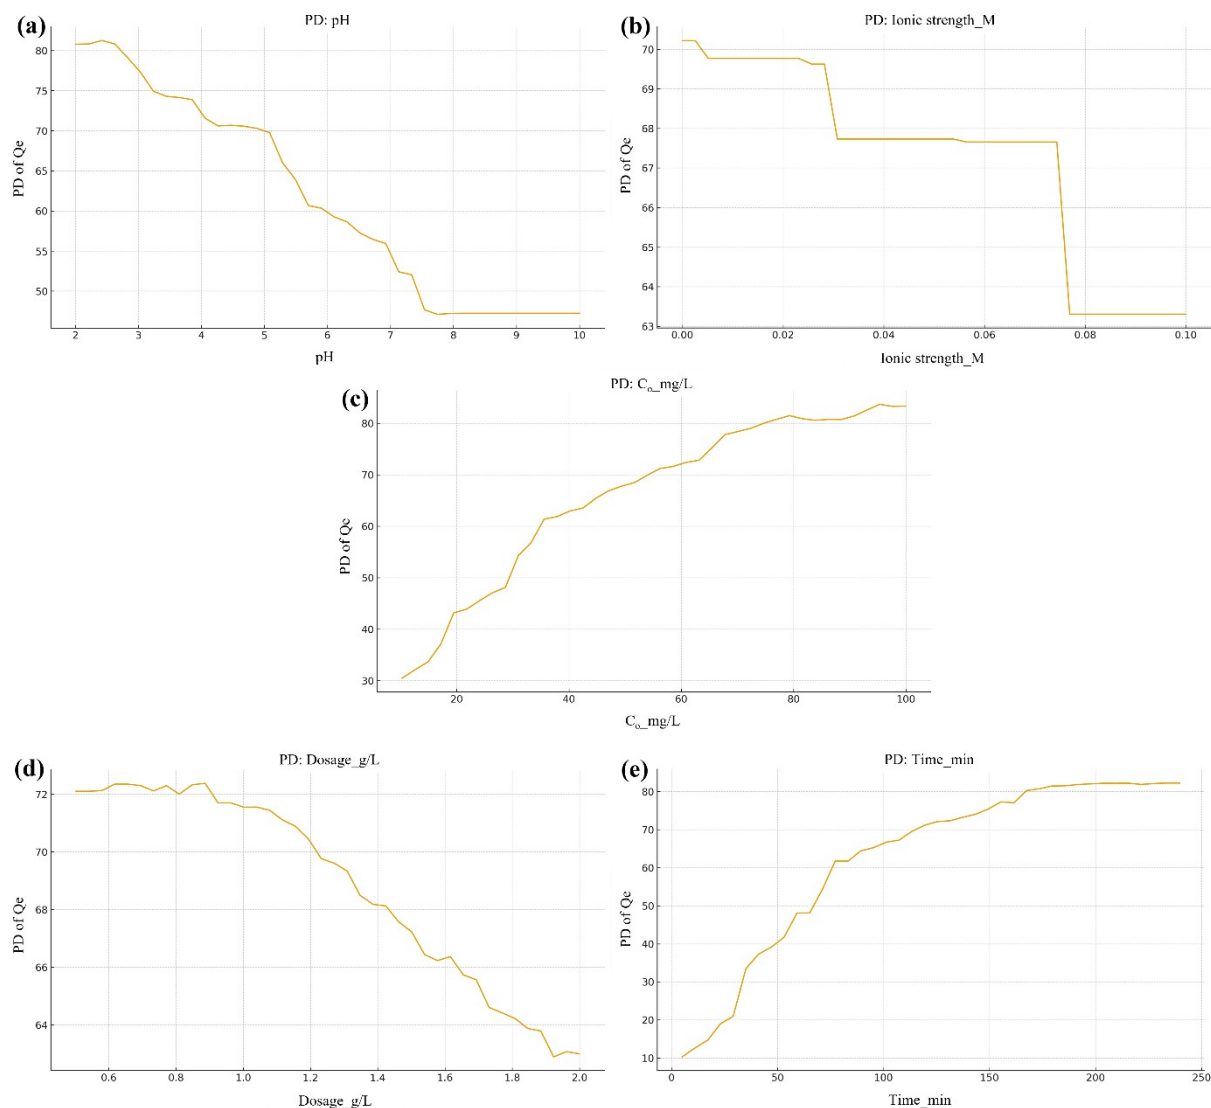

**Fig. S13.** Partial Dependence (PD) of predictors on adsorption capacity  $Q_e$

In **Fig. S13**, (a) pH, (b) ionic strength  $\mu$ , (c) initial concentration  $C_0$ , (d) dosage, (e) contact time  $t$ . Partial dependence (PD) plots quantify the marginal effect of each predictor on the predicted adsorption capacity  $Q_e$  ( $\text{mg g}^{-1}$ ), using a Random Forest (RF) surrogate trained on Dataset S1. For each panel, the focal variable varies across its observed range while all other variables are fixed at their median. (a) pH:  $Q_e$  decreases monotonically with pH, consistent with reduced electrostatic attraction to anionic chromate species at higher pH relative to the biochar surface charge. (b) Ionic strength ( $\mu$ ):  $Q_e$  declines with increasing  $\mu$ , indicating screening of electrostatic interactions and competition from background electrolyte. (c)  $C_0$ :  $Q_e$  increases with  $C_0$  and approaches a plateau, consistent with site saturation (Langmuir-like behavior). (d) Dosage: a mild negative dependence (per-gram capacity) as dosage increases, attributable to site overlap/aggregation and reduced driving force per unit mass at fixed  $C_0$ . (e) Time:  $Q_e$  increases rapidly at short times and then asymptotically approaches equilibrium, matching typical adsorption kinetics.



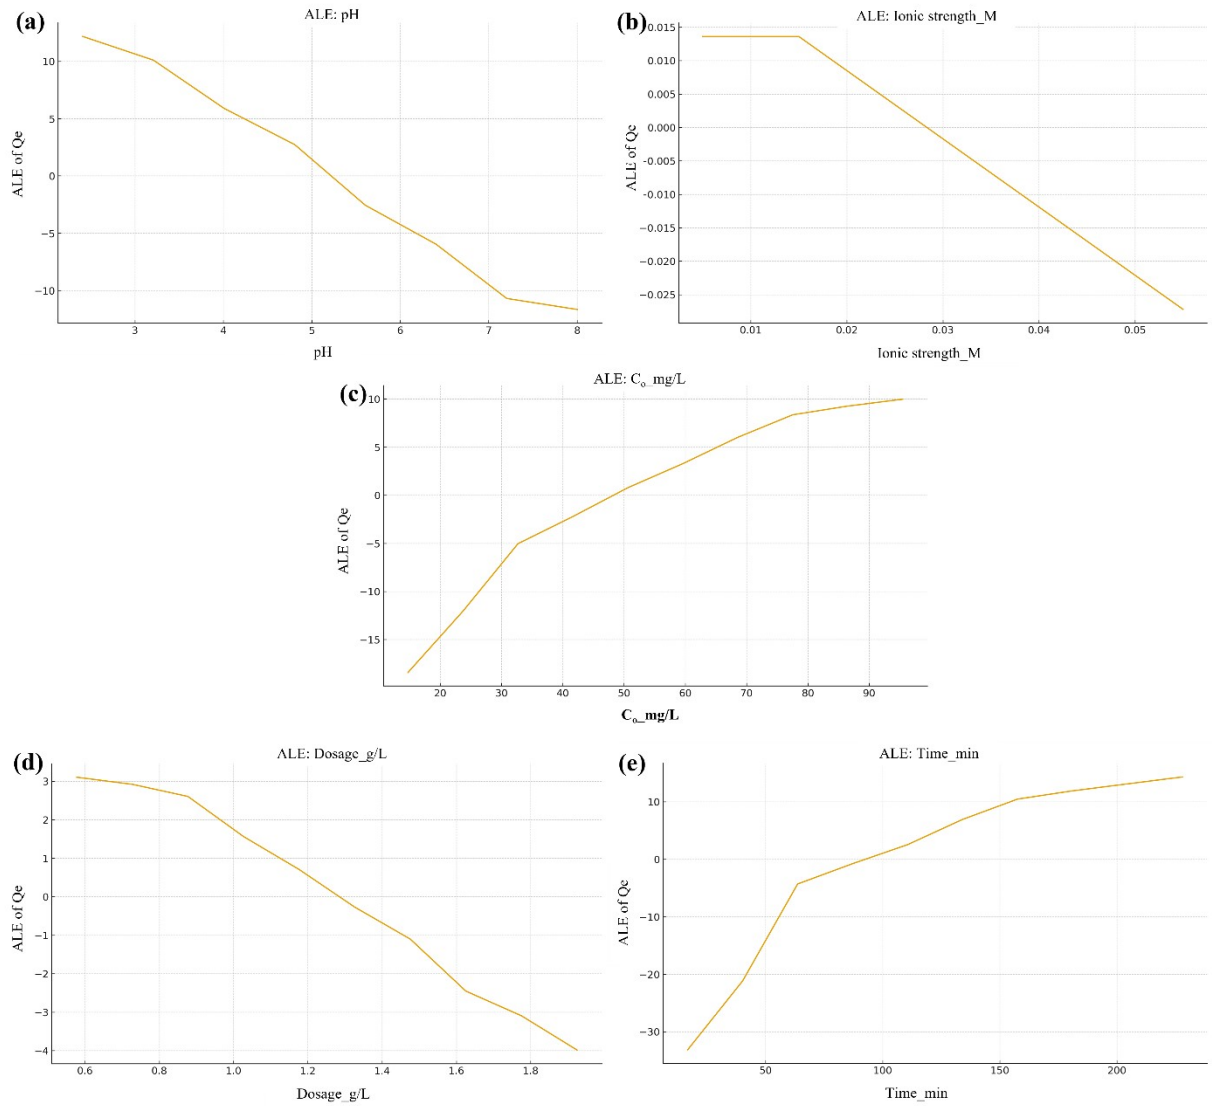

**Fig. S14.** Accumulated Local Effects (ALE) for main effects on  $Q_e$

In **Fig. S14**, (a) pH, (b) ionic strength  $\mu$ , (c) initial concentration  $C_0$ , (d) dosage, (e) contact time  $t$ . One-dimensional ALE curves describe localized, conditional effects while mitigating extrapolation bias. Effects are reported in centered units (mean ALE = 0), so vertical offsets represent relative contributions. (a) pH: a consistently negative ALE with increasing pH confirms the adverse effect of alkalinity on capacity. (b)  $\mu$ : ALE is negative and steepest at low-to-moderate  $\mu$ , reflecting strong sensitivity to electrolyte screening when moving away from deionized conditions. (c)  $C_0$ : positive ALE with diminishing returns at high  $C_0$ , consistent with progressive site saturation. (d) Dosage: slightly negative ALE, supporting a per-gram capacity penalty at higher mass loadings. (e) Time: positive ALE with an asymptote, indicating approach to equilibrium; the steep initial rise captures the fast kinetic regime.

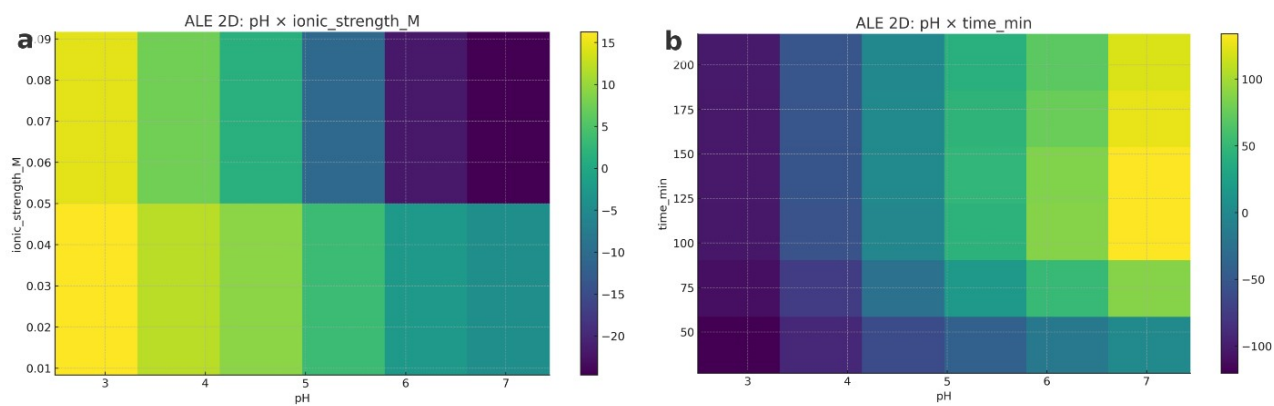

**Fig. S15.** Two-dimensional ALE (interaction structure)

In **Fig. S15**, (a)  $\text{pH} \times \text{ionic strength } \mu$ , (b)  $\text{pH} \times \text{time } t$ . Two-dimensional ALE heatmaps show how pairs of variables jointly shape  $Q_e$ . Values are centered to zero for interpretability. (a)  $\text{pH} \times \mu$ : the most favorable region is at low pH and low  $\mu$ ; the negative effect of pH intensifies as  $\mu$  increases, evidencing synergistic deterioration of capacity when both alkalinity and electrolyte screening rise. (b)  $\text{pH} \times \text{time}$ : increasing time attenuates the detrimental impact of higher pH as the system approaches equilibrium; at shorter times, adsorption is more pH-sensitive, while at long times the surface approaches near-saturation across pH, flattening the response. These interactions are chemically consistent with electrostatic mechanisms ( $\text{pH}$ ,  $\mu$ ) modulating rates and apparent equilibria.

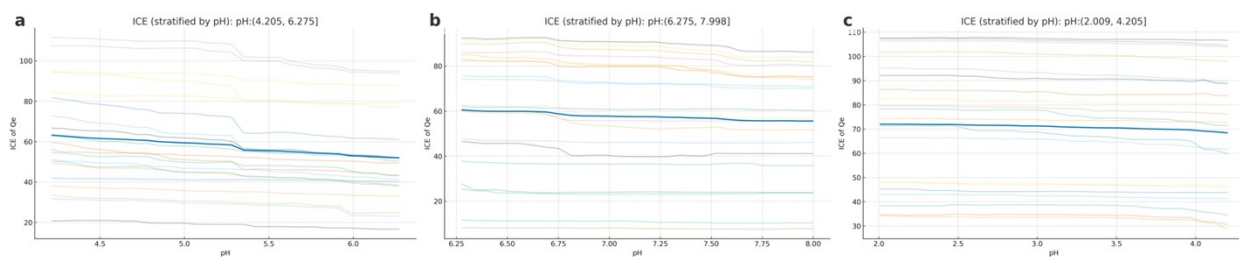

**Fig. S16.** Stratified ICE curves by pH tertiles (feature varied: pH)

In **Fig. S16**, (a–c) three pH tertiles (low  $\rightarrow$  high). Individual Conditional Expectation (ICE) curves display instance-level trajectories of predicted  $Q_e$  as pH varies, stratified by pH tertiles to emphasize heterogeneity in local response. Faint lines are per-sample ICE; bold lines show the stratum-wise mean. Lower-pH strata exhibit higher levels of  $Q_e$  across the varied pH range and weaker dispersion near acidic conditions, indicating consistently favorable adsorption. In higher-pH strata, both the mean and upper envelope of ICE curves drop, confirming stronger sensitivity to pH in alkaline contexts. The stratified means parallel the PD/ALE results while revealing within-stratum variability important for local interpretability.

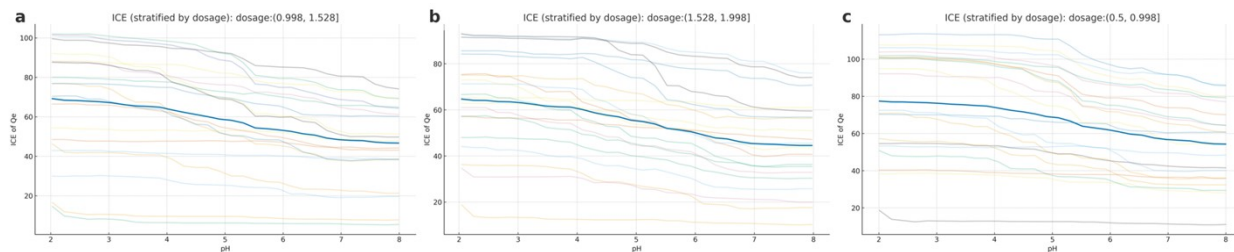

**Fig. S17.** Stratified ICE curves by dosage tertiles (feature varied: pH)

In **Fig. S17**, (a–c) three dosage tertiles (low  $\rightarrow$  high). ICE curves are computed as pH varies within dosage tertiles. At low dosage, per-gram capacity is larger and pH sensitivity is pronounced (steeper decline as pH increases). At higher dosage, curves shift downward on a per-gram basis and the mean ICE shows slightly reduced slope, consistent with site crowding/aggregation and the per-mass normalization of  $Q_e$ . The combination of S16 and S17 clarifies that pH governs electrostatic favorability, while dosage modulates effective capacity per unit mass, jointly controlling the observed performance.

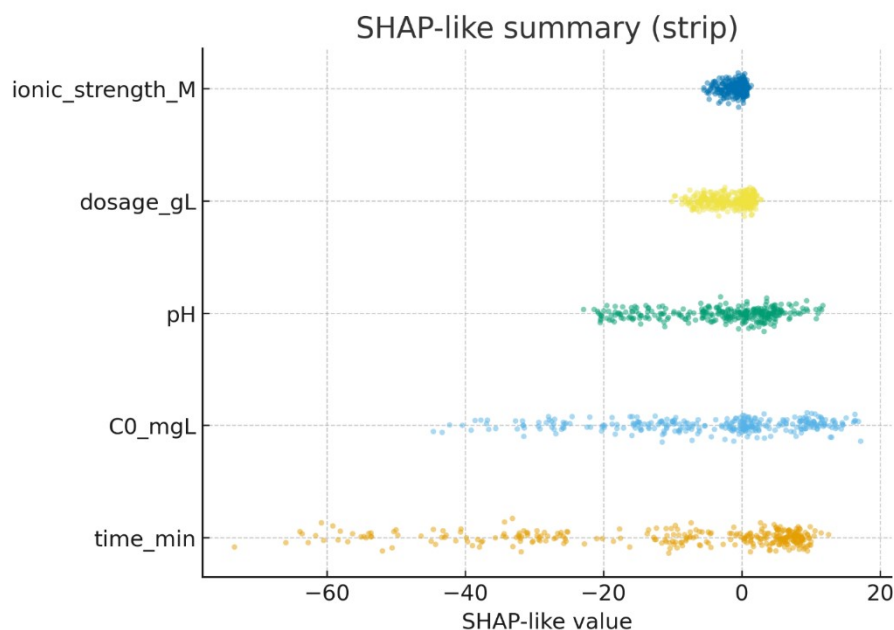

**Fig. S18.** SHAP summary (global importance and distribution)

**Fig. S18**, SHAP-style summary (“beeswarm”) visualizes the global contribution distribution (SHAP or SHAP-like  $\phi$  values) for each feature on predicted  $Q_e$ . Features are ordered by mean absolute contribution, highlighting overall importance. In agreement with domain expectations, time and  $C_0$  show strong positive contributions (longer contact and higher driving force), whereas pH and ionic strength contribute negatively (less favorable electrostatics as these increase). Dosage typically exerts a mild negative per-gram effect. The horizontal spread reflects heterogeneity across the dataset (context-dependent effects).

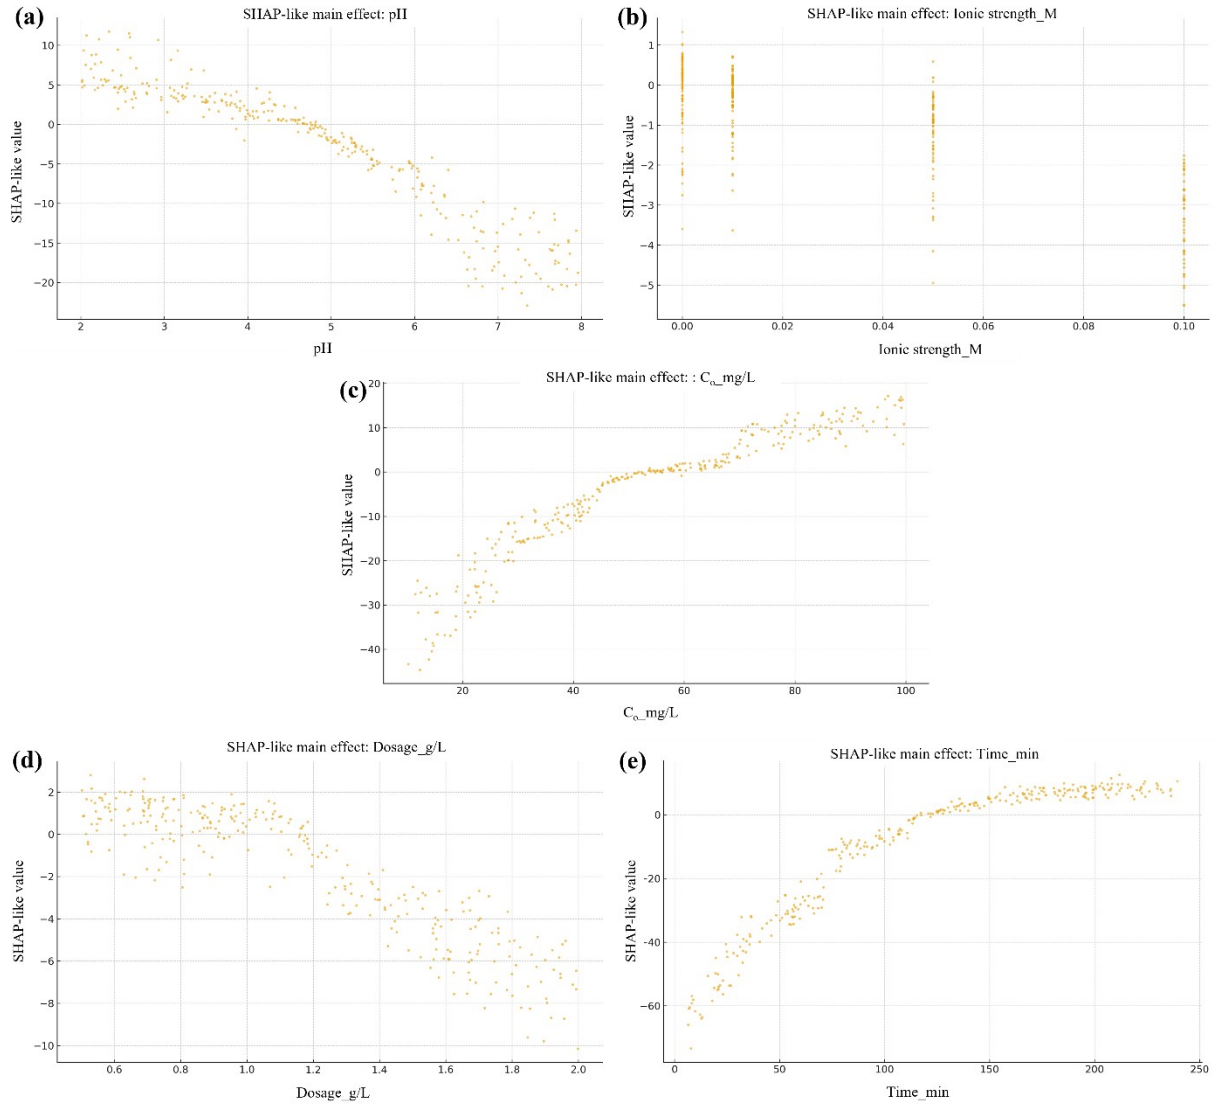

**Fig. S19.** SHAP main-effect dependence

In **Fig. S19**, (a) pH, (b) ionic strength  $\mu$ , (c)  $C_0$ , (d) dosage, (e) time. Caption: Dependence plots relate each feature's value to its SHAP(-like) contribution  $\phi$  to  $Q_e$ . (a) pH: contributions become more negative as pH increases; (b)  $\mu$ : contributions are more negative at higher  $\mu$ , indicating electrolyte screening; (c)  $C_0$ : positive with diminishing marginal gains, tracking saturation; (d) Dosage: slightly negative per-gram contributions at higher dosage; (e) Time: positive and saturating, consistent with approach to equilibrium. These main-effect profiles mirror PD/ALE trends while reporting additive attributions on a common scale.

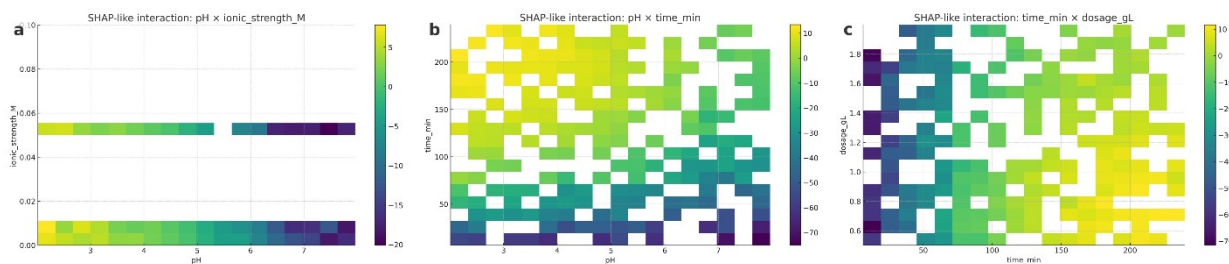

**Fig. S20.** SHAP pairwise interaction maps

**In Fig. S20,** (a)  $\text{pH} \times \text{ionic strength } \mu$ , (b)  $\text{pH} \times \text{time } t$ , (c)  $\text{time } t \times \text{dosage}$ . Interaction visualizations show how joint feature states redistribute SHAP(-like) contributions. (a)  $\text{pH} \times \mu$ : most positive contributions occur at low pH and low  $\mu$ ; contributions become increasingly negative as either pH or  $\mu$  rises, demonstrating synergistic penalty from alkalinity and screening. (b)  $\text{pH} \times \text{time}$ : increasing time partly offsets the negative pH effect (higher contributions at long  $t$  even under moderate pH), indicating kinetic relief as equilibrium is approached. (c)  $\text{time} \times \text{dosage}$ : at longer times, capacity contributions are positive across dosages, but per-gram gains are attenuated at high dosage, aligning with the mild negative main effect of dosage. Altogether, SHAP interactions corroborate the 2D ALE patterns and provide an attributional perspective on coupled controls.

## References

- [1] Y.-n. Liu, Z.-h. Guo, Y. Sun, W. Shi, Z.-y. Han, X.-y. Xiao, P. Zeng, Stabilization of heavy metals in biochar pyrolyzed from phytoremediated giant reed (*Arundo donax*) biomass, *Transactions of Nonferrous Metals Society of China*, 27 (2017) 656-665.
- [2] D.-K. Nguyen, Q.-B. Ly-Tran, V.-P. Dinh, B.-N. Duong, T.-P.-T. Nguyen, P. Nguyen Kim Tuyen, Adsorption mechanism of aqueous Cr(vi) by Vietnamese corncob biochar: a spectroscopic study, *RSC Advances*, 14 (2024) 39205-39218.
- [3] L. Ton-That, T.-P.-T. Nguyen, B.-N. Duong, D.-K. Nguyen, N.-A. Nguyen, T.H. Ho, V.-P. Dinh, Insights into Pb (II) adsorption mechanisms using jackfruit peel biochar activated by a hydrothermal method toward heavy metal removal from wastewater, *Biochemical Engineering Journal*, 212 (2024) 109525.
- [4] V.-P. Dinh, D.-K. Nguyen, T.-T. Luu, Q.-H. Nguyen, L.A. Tuyen, D.D. Phong, H.A.T. Kiet, T.-H. Ho, T.T.P. Nguyen, T.D. Xuan, P.T. Hue, N.T.N. Hue, Adsorption of Pb(II) from aqueous solution by pomelo fruit peel-derived biochar, *Materials Chemistry and Physics*, 285 (2022) 126105.
- [5] L. Dunnigan, P.J. Ashman, X. Zhang, C.W. Kwong, Production of biochar from rice husk: Particulate emissions from the combustion of raw pyrolysis volatiles, *Journal of Cleaner Production*, 172 (2018) 1639-1645.
